# Supplementary material for: Porous anatase TiO2 derived from a titanium metal–organic framework as a multifunctional phospho-oriented nanoreactor integrating accelerated digestion of proteins and in situ enrichment
Source: Royal Society of Chemistry journal article supplement (doi:10.1039/c6ra03837a), 2016-01-01
Supplement: c6ra03837a1.pdf [file c6ra03837a1.pdf]

Electronic Supplementary Information (ESI)

**Porous anatase TiO<sub>2</sub> derived from a titanium metal-organic framework as a multifunctional phospho-oriented nanoreactor integrating accelerated digestion of proteins and *in situ* enrichment**

Man Zhao, Tianqi Chen and Chunhui Deng\*

Department of Chemistry and Institute of Biomedical Sciences, Collaborative Innovation Center of Genetics and Development, Fudan University, Shanghai 200433, China.

Email: chdeng@fudan.edu.cn

## 1 Experimental section

### 2 1. Materials and reagents

3 Terephthalic acid, N,N-dimethylformamide (DMF) and anhydrous methanol were purchased from  
4 Sinopharm Chemical Reagent Co., Ltd. (Shanghai, China). Titanium (IV) isopropoxide was purchased from  
5 Sigma Chemical (St. Louis, MO, USA).

6 Bovine  $\beta$ -casein, ammonium bicarbonate ( $\text{NH}_4\text{HCO}_3$ ), L-1-tosylamido-2-phenylethylchloromethyl  
7 ketone (TPCK) treated trypsin (from bovine pancreas),  $\alpha$ -cyano-4-hydroxy-cinnamic acid ( $\alpha$ -CHCA), 2,5-  
8 dihydroxybenzoic acid (DHB) and trifluoroacetic acid (TFA) were purchased from Sigma Chemical (St.  
9 Louis, MO, USA). Acetonitrile (ACN) was purchased from Merck (Darmstadt, Germany). Deionized water  
10 was purified by a Milli-Q system (Milford, MA, USA).

11 All other chemicals and reagents were of the highest grade commercially available and used as received.

12

### 13 2. Synthesis of MIL-125 (Ti) and HPT

14 Since the hierarchical porous anatase  $\text{TiO}_2$  (HPT) is obtained through the thermal decomposition of the  
15 titanium metal-organic framework MIL-125 (Ti), MIL-125 (Ti) MOFs were synthesized at the very  
16 beginning. MIL-125 (Ti) MOFs were prepared by a hydrothermal reaction. Detailedly, 3.0 g of terephthalic  
17 acid was firstly dispersed in 60 mL of DMF, followed by the addition of 9 mL anhydrous methanol and 3  
18 mL titanium (IV) isopropoxide. Next, the mixture was transferred into a 200 mL Teflon-lined stainless steel  
19 autoclave and ultrasonicated for 5 min. After that, the autoclave was sealed and heated at 150 °C for 24 h.  
20 After cooling down to room temperature, the resulting white precipitation was gathered by centrifugation,  
21 and sequentially washed with methanol and DMF. The products were dried in vacuum at 50 °C for  
22 characterization and future use.

23 HPT was synthesized by the hydrolysis of the MIL-125 (Ti) MOFs precursor and subsequent calcination  
24 in air. In detail, 500 mg of MIL-125 (Ti) powders were dispersed in 200 mL of deionized water and  
25 refluxed at 90 °C for 3 h. The pretreated MOFs were washed with deionized water three times and then with  
26 ethanol three times. After washing and drying, the MIL-125 (Ti) powders were calcined at 400 °C for 4 h.  
27 The heating temperature was raised from room temperature to 400 °C at a heating rate of 5 °C  $\text{min}^{-1}$ .

28

### 29 3. Characterizations of MIL-125 (Ti) and HPT

30 Various characterization technologies were used to demonstrate the successful synthesis of MIL-125 (Ti)

1 MOFs and HPT.

2 The scanning electron microscope (SEM) images and the energy dispersive X-ray (EDX) spectra were  
3 taken to reveal the morphology and chemical composition of MIL-125 (Ti) and HPT. The SEM images  
4 were recorded on a Nova NanoSem 450 electron microscope (FEI, USA) operated at 15 kV, and the EDX  
5 spectra were collected on a Phenom Prox electron microscope (Phenom, Netherlands) operating at 15 kV.

6 The transmission electron microscope (TEM) images were taken to observe the structure of MIL-125 (Ti)  
7 and HPT. The TEM observation was characterized by a JEM-2011 electron microscope (JEOL, Japan)  
8 operated at 200 kV. The samples were dispersed in ethanol beforehand and collected for analysis by using  
9 carbon film-covered copper grids.

10 The powder X-ray diffraction (XRD) patterns were collected to confirm the crystal structure of MIL-125  
11 (Ti) and HPT. The XRD patterns were identified using a D8 Advance X-ray diffractometer (Bruker,  
12 Germany) with Ni-filtered  $\text{CuK}\alpha$  radiation (40 kV, 40 mA).

13 The nitrogen adsorption-desorption isotherms were measured to estimate the surface area and the pore  
14 size of HPT. The  $\text{N}_2$  adsorption-desorption isotherms were recorded at 77 K with a Micromeritics Tristar  
15 3000 analyzer (Tristar, USA). The samples were degassed in vacuum at 200 °C for 8 h prior to  
16 measurement. The Brunauer-Emmett-Teller (BET) method was adopted to calculate the surface area and  
17 the Barrett-Joyner-Halenda (BJH) method was used to determine the average pore size.

18 The Fourier transform infrared (FT-IR) spectra and the Raman spectra were recorded to show the  
19 characteristic groups of MIL-125 (Ti) and HPT. The positions and intensities of the peaks in the spectra  
20 change with the collapse of MIL-125 (Ti) and the formation of HPT. The FT-IR spectra were collected on a  
21 Nexus 470 Fourier spectrophotometer (Nicolet, USA) using KBr pellets. The Raman spectra observation  
22 was performed at room temperature on a LabRam-1B Raman spectrometer (JY, France) with a laser at an  
23 excitation wavelength of 632.8 nm.

24

#### 25 **4. Tryptic digestion of bovine $\beta$ -casein and the commercial nonfat bovine milk**

26 To prepare the  $\text{NH}_4\text{HCO}_3$  solution of bovine  $\beta$ -casein, we dissolved 5 mg of  $\beta$ -casein in 1 mL of  
27 deionized water and denatured it in a boiling water bath for 5 min. The  $\beta$ -casein aqueous solution was  
28 exchanged into 25 mM  $\text{NH}_4\text{HCO}_3$  buffer (with the final pH of 8.3 and the final concentration of 1  $\mu\text{g}/\mu\text{L}$ ).  
29 For the in-solution digestion of  $\beta$ -casein, we incubated the  $\beta$ -casein solution with trypsin at 37 °C for 16 h.  
30 The weight (of trypsin) to weight (of protein) ratio was 1:40. The resultant tryptic digest was diluted with

1 25 mM  $\text{NH}_4\text{HCO}_3$  solution to lower concentrations for the investigation on low-concentration  $\beta$ -casein  
2 tryptic digests.

3 Before the in-solution and the HPT-assisted digestion of commercial nonfat bovine milk, 30  $\mu\text{L}$  of the  
4 milk was diluted with 900  $\mu\text{L}$  of 25 mM  $\text{NH}_4\text{HCO}_3$  solution. The solution was then centrifugated at 10000  
5 rpm for 25 min, and the supernatant was collected for tryptic digestion.

6

## 7 **5. Activation of HPT**

8 To enrich phosphopeptides from  $\beta$ -casein tryptic digests or to accelerate the digestion process of  $\beta$ -casein  
9 protein, we dispersed 10 mg of HPT in 1 mL of 50% ethanol (v/v) aqueous solution with the help of  
10 ultrasonication in advance. And we activated the HPT by washing it with 100  $\mu\text{L}$  of 50%ACN/0.1%TFA  
11 (v/v) buffer three times before the enrichment or the assisted digestion.

12

## 13 **6. Preparation of $\alpha$ -CHCA and DHB matrix**

14 To prepare the  $\alpha$ -CHCA matrix solution, we dissolved 8 mg of  $\alpha$ -CHCA in 1 mL of 50%ACN/0.1%TFA  
15 (v/v) buffer. Meanwhile, 6 mg of ammonium hydrogen citrate was dissolved in 10 mL of  
16 50%ACN/0.1%TFA buffer. The two solutions of equal volume were mixed to obtain the  $\alpha$ -CHCA matrix.

17 To prepare the DHB matrix solution, we dissolved 20 mg of DHB in 1 mL of 50% ACN (v/v) aqueous  
18 solution containing 1%  $\text{H}_3\text{PO}_4$  (v/v).

19

## 20 **7. Enrichment of phosphopeptides from $\beta$ -casein tryptic digests**

21 Firstly, the  $\beta$ -casein tryptic digest was diluted to different concentrations with 50%ACN/0.1%TFA. Next,  
22 200  $\mu\text{g}$  of the preactivated HPT was added into each dilution (with the volume of 200  $\mu\text{L}$ ). The mixtures  
23 were vibrated in a shaker at 37  $^\circ\text{C}$  for 30 min to ensure equilibrium. After centrifugation and removal of the  
24 supernatant, the HPT was rinsed with 200  $\mu\text{L}$  of 50%ACN/0.1%TFA three times. Afterwards, 10  $\mu\text{L}$  of 0.4  
25 M ammonium was added and vibrated for 10 min to elute the phosphopeptides captured in the HPT. The  
26 eluent was deposited on a MALDI sample target (Applied Biosystems/MDS SCIEX, Foster City, CA, USA)  
27 and dried at room temperature. For comparison, the  $\beta$ -casein tryptic digests without enrichment were also  
28 dropped on the same sample target. Later on, 0.8  $\mu\text{L}$  of DHB matrix was deposited on it and dried. Four  
29 replicate spots were taken for every sample. The substrates were submitted to MALDI-TOF MS for  
30 analysis.

1

## 2 **8. In-solution digestion in the presence of HPT**

3 Before the HPT-assisted digestion, 200 µg of HPT was activated with 50%ACN/0.1%TFA and was then  
4 added into 200 µL of β-casein in-solution digestion systems (with the concentrations of 1 µg/µL, 0.1 µg/µL  
5 and 0.01µg/µL) or the nonfat bovine milk in-solution digestion system (with the concentration of 1 µg/µL).  
6 The mixtures were incubated at 37 °C for 30min. After incubation, HPT was separated from the supernatant  
7 by centrifugation and rinsed with 200 µL of 50%ACN/0.1%TFA three times. After that, 10 µL of 0.4 M  
8 ammonium was added to elute the phosphopeptides captured in HPT. The supernatant and the eluent were  
9 deposited on a MALDI sample target and dried at room temperature, followed by the addition of α-CHCA  
10 (for the supernatant) or DHB (for the eluent) matrix.

11 For comparison, in-solution digestions with an enzyme to protein ratio of 1:40 (w/w) for 16 h and 30 min  
12 were also carried out under the same condition. The tryptic digestion products were dropped on a MALDI  
13 sample target and dried. Finally, the α-CHCA matrix was dropped on the sample spots.

14

## 15 **9. MALDI-TOF MS analyses**

16 MALDI-TOF MS analyses were performed in positive reflective mode on a 5800 Proteomics Analyzer  
17 (Applied Biosystems, Framingham, MA, USA) with the Nd: YAG laser (383 nm) operated at a repetition  
18 rate of 200 Hz and an acceleration voltage of 20 kV. All the spectra were taken from signal-averaging of  
19 1000 laser shots with the laser intensity kept at a proper constant.

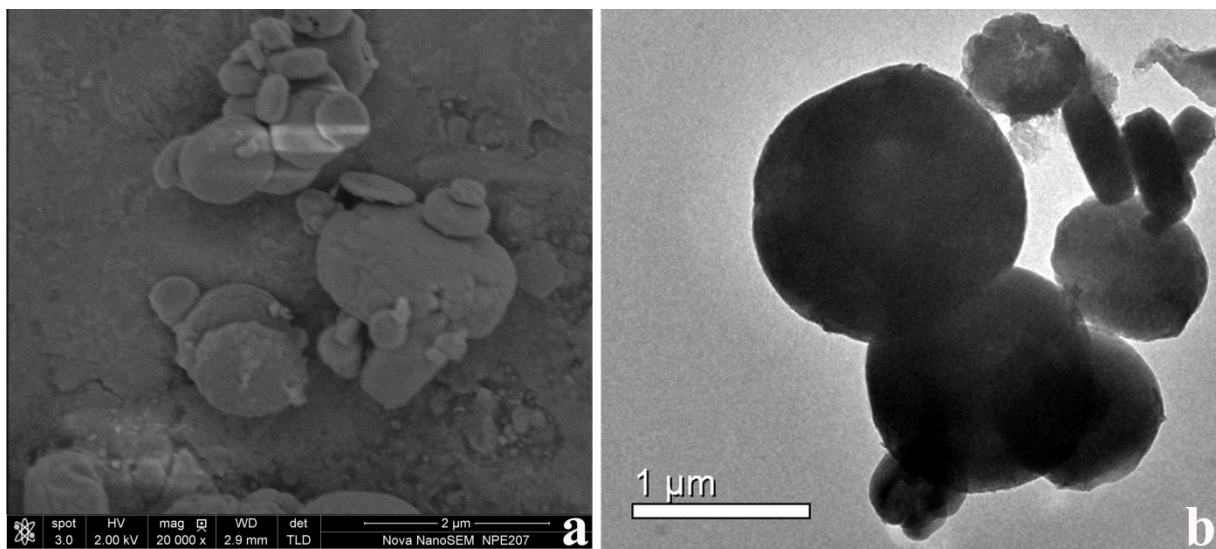

**Fig. S1** The SEM image (a) and TEM image (b) of MIL-125 (Ti) MOFs.

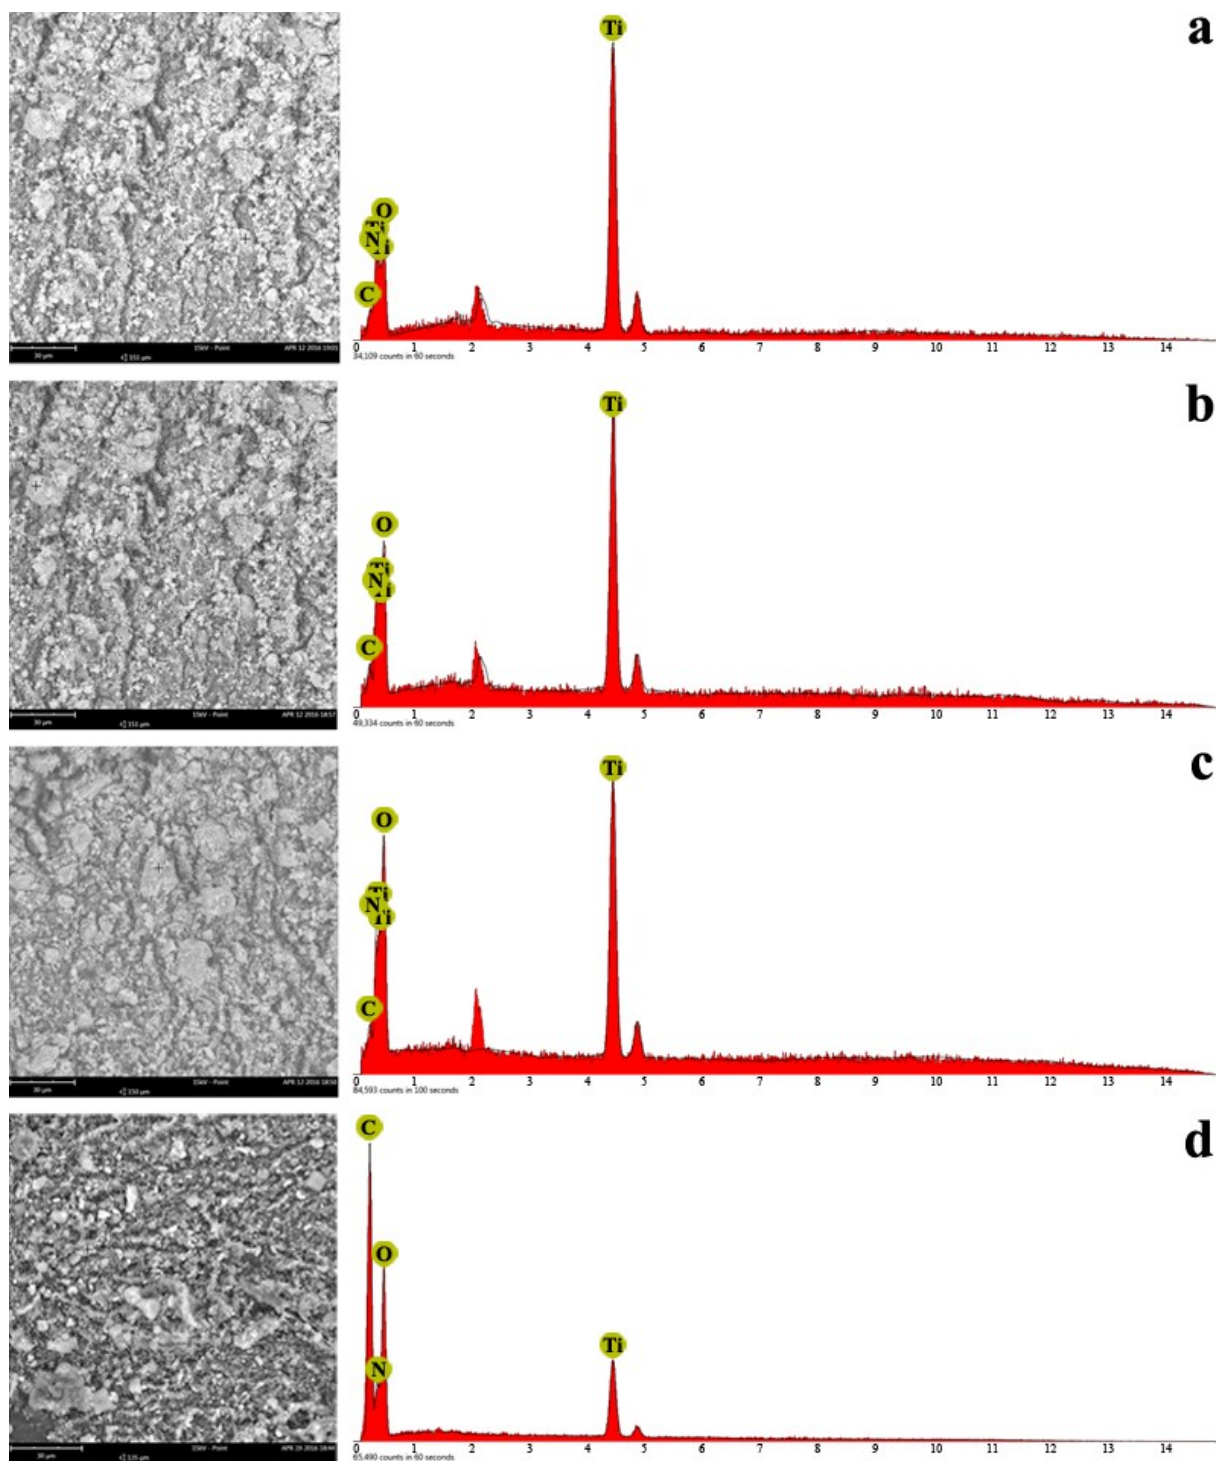

**Fig. S2** The energy dispersive X-ray (EDX) spectra of HPT (a, b and c) and MIL-125 (Ti) (d) and the corresponding regions chosen for EDX analysis. Three different regions were selected for the EDX analysis of HPT.

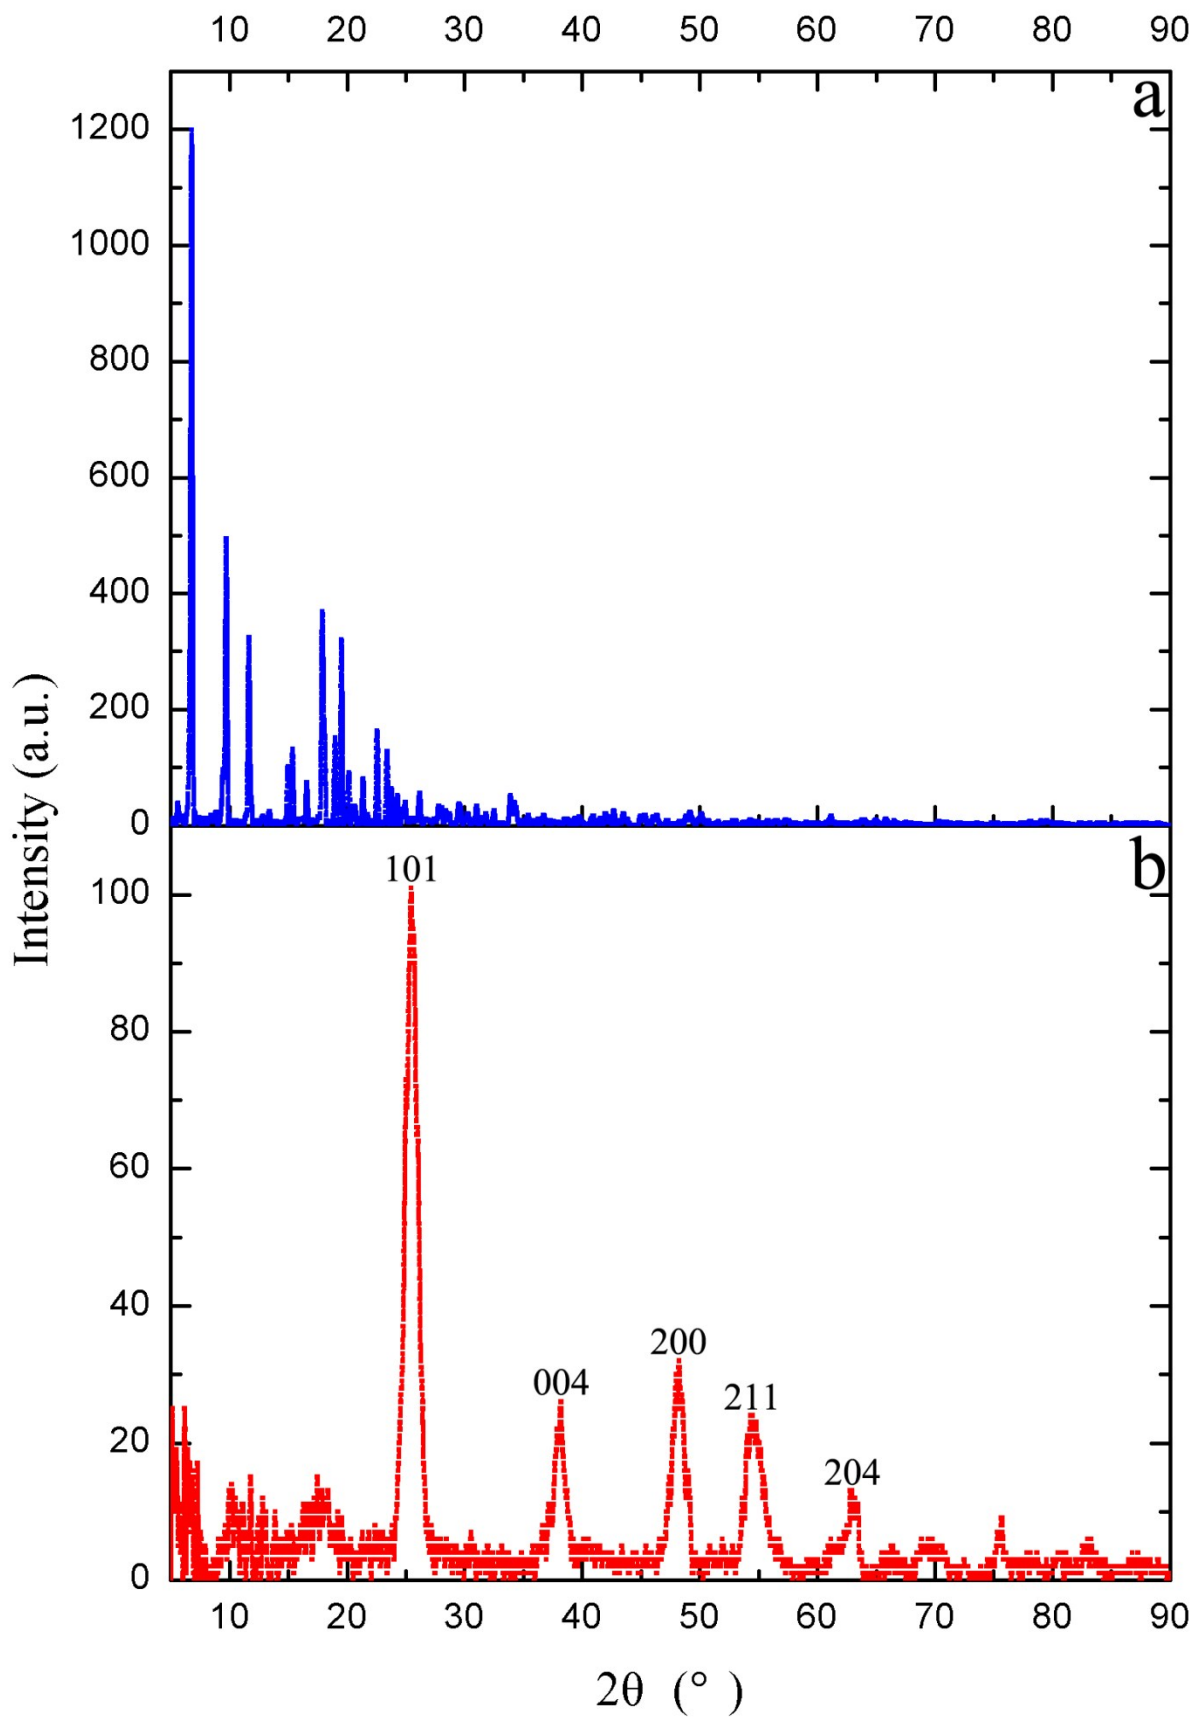

**Fig. S3** The XRD patterns of MIL-125 (Ti) MOFs (a) and HPT (b). Peaks originated from HPT are marked with miller indexes.



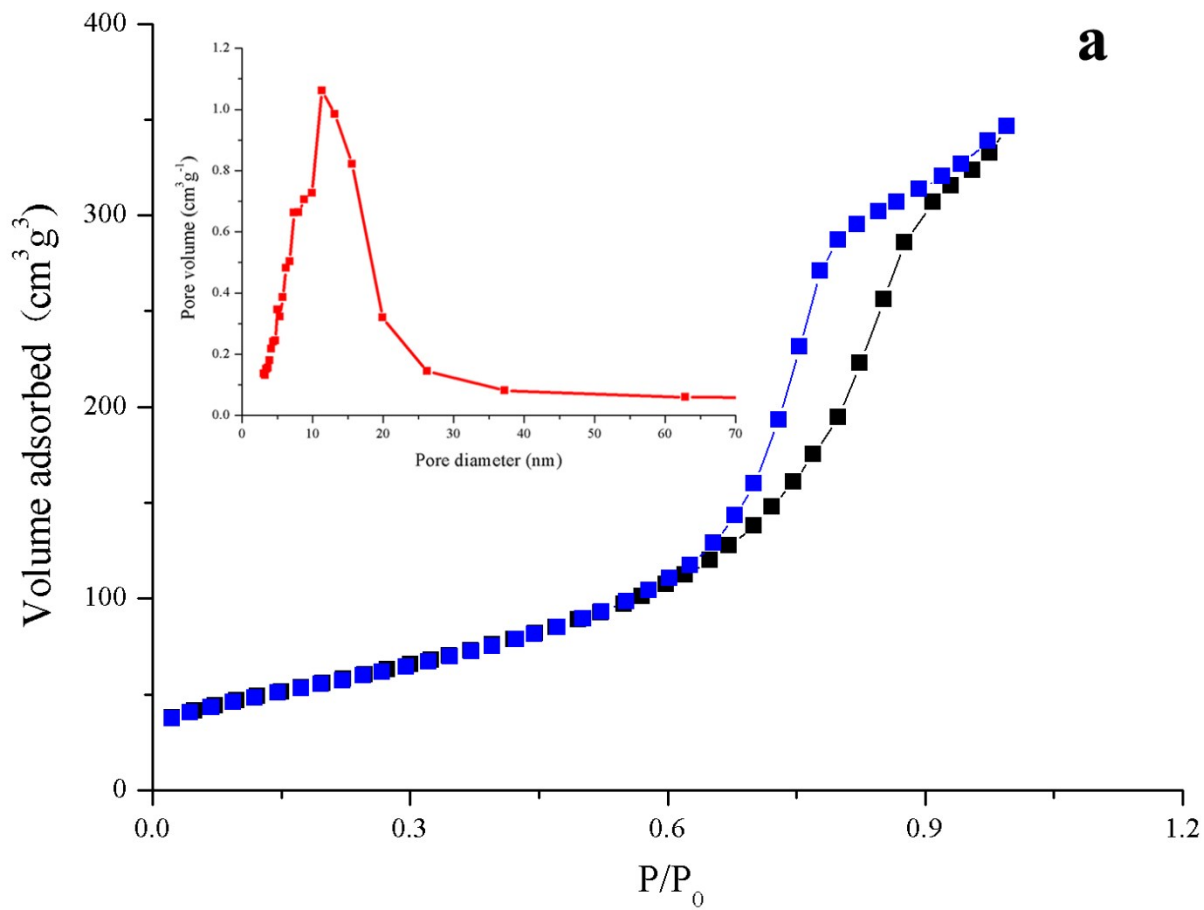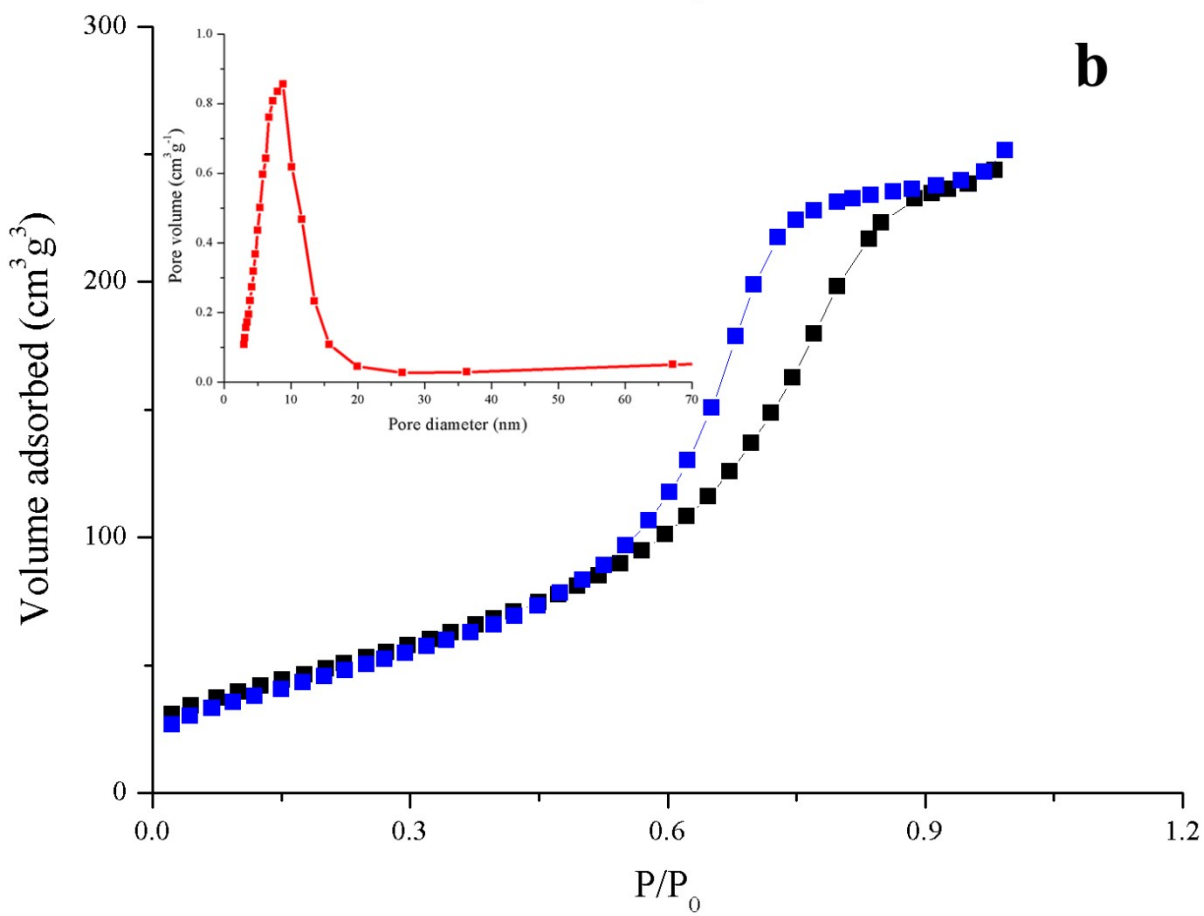

**Fig. S4** The nitrogen adsorption-desorption isotherms of HPT with (a) and without (b) the hydrolysis of MIL-125 (Ti) MOFs measured at 77 K. The inset shows the corresponding pore size distribution analysis obtained using the Barrett-Joyner-Halenda (BJH) method.

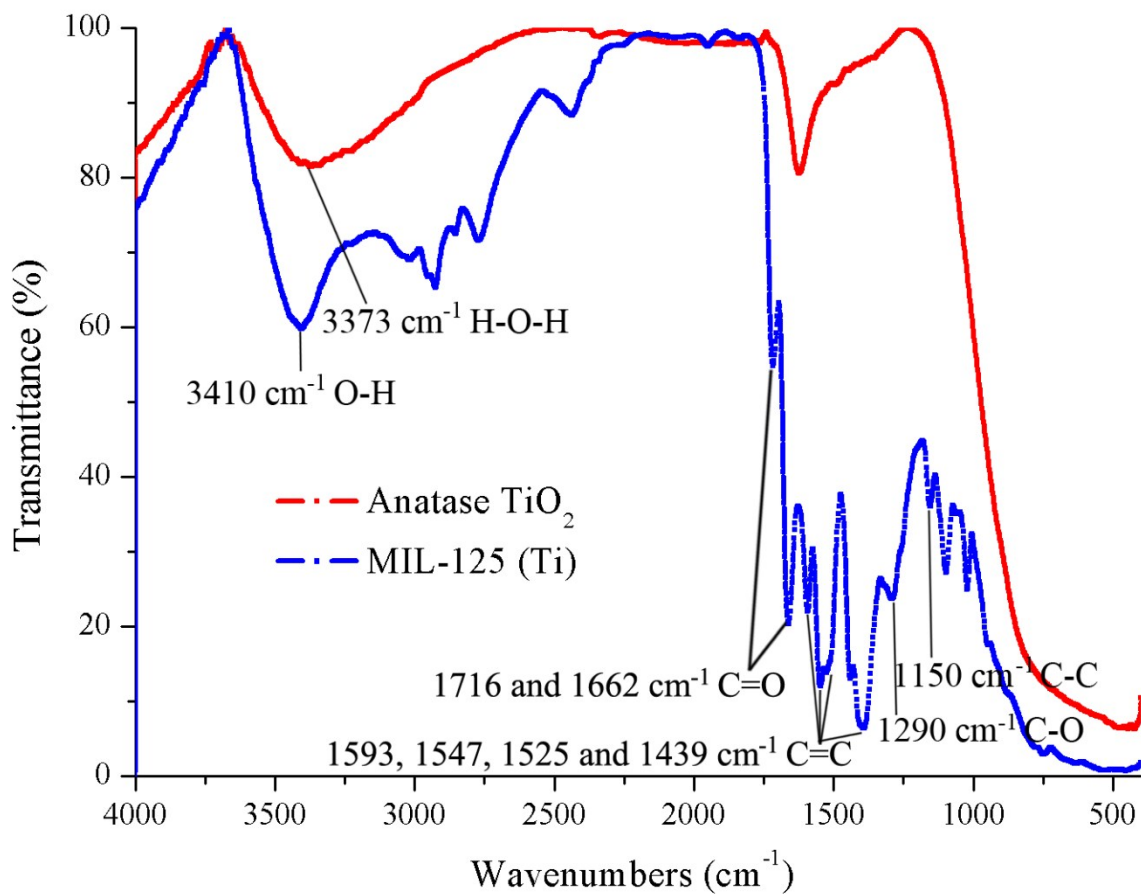

**Fig. S5** The FT-IR spectra of MIL-125 (Ti) and HPT.

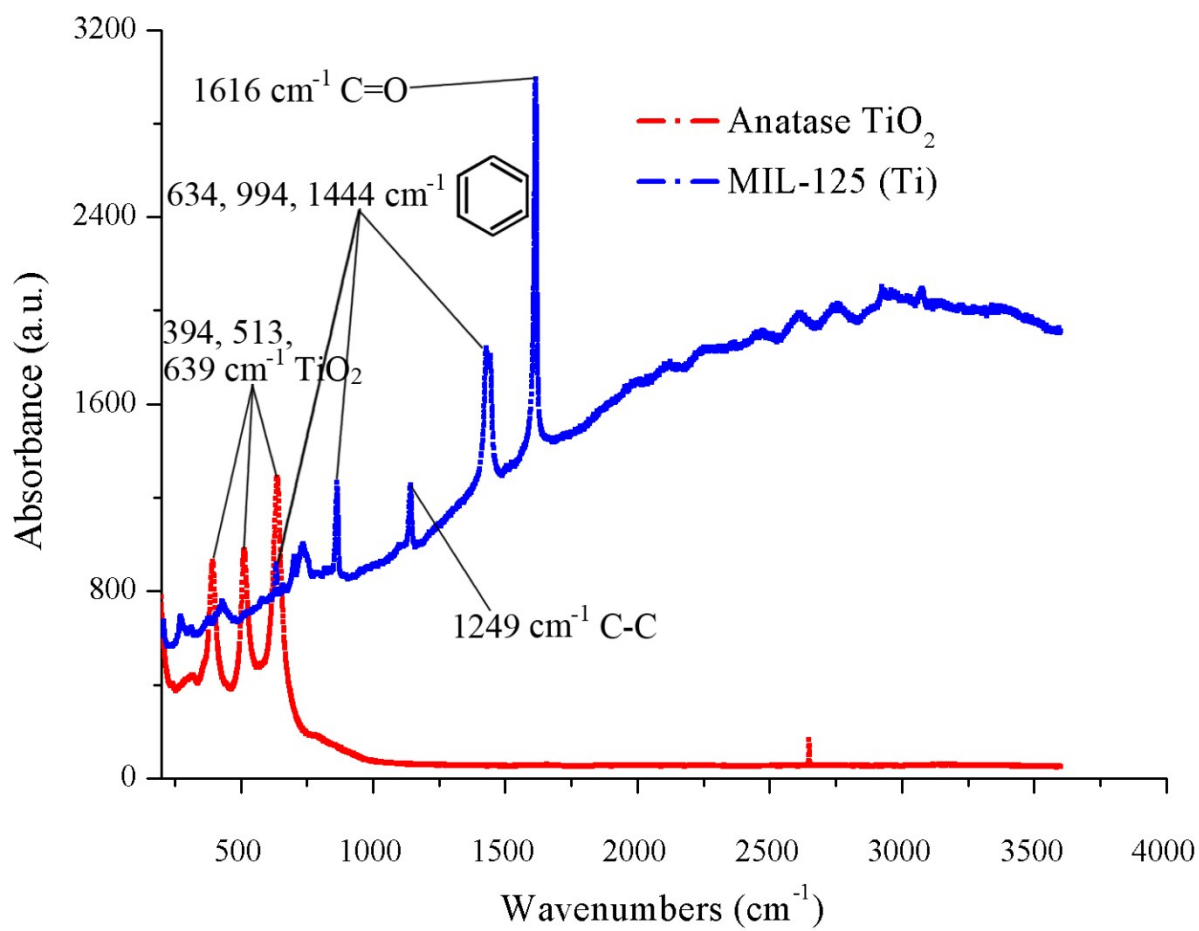

**Fig. S6** The Raman spectra of MIL-125 (Ti) and HPT.

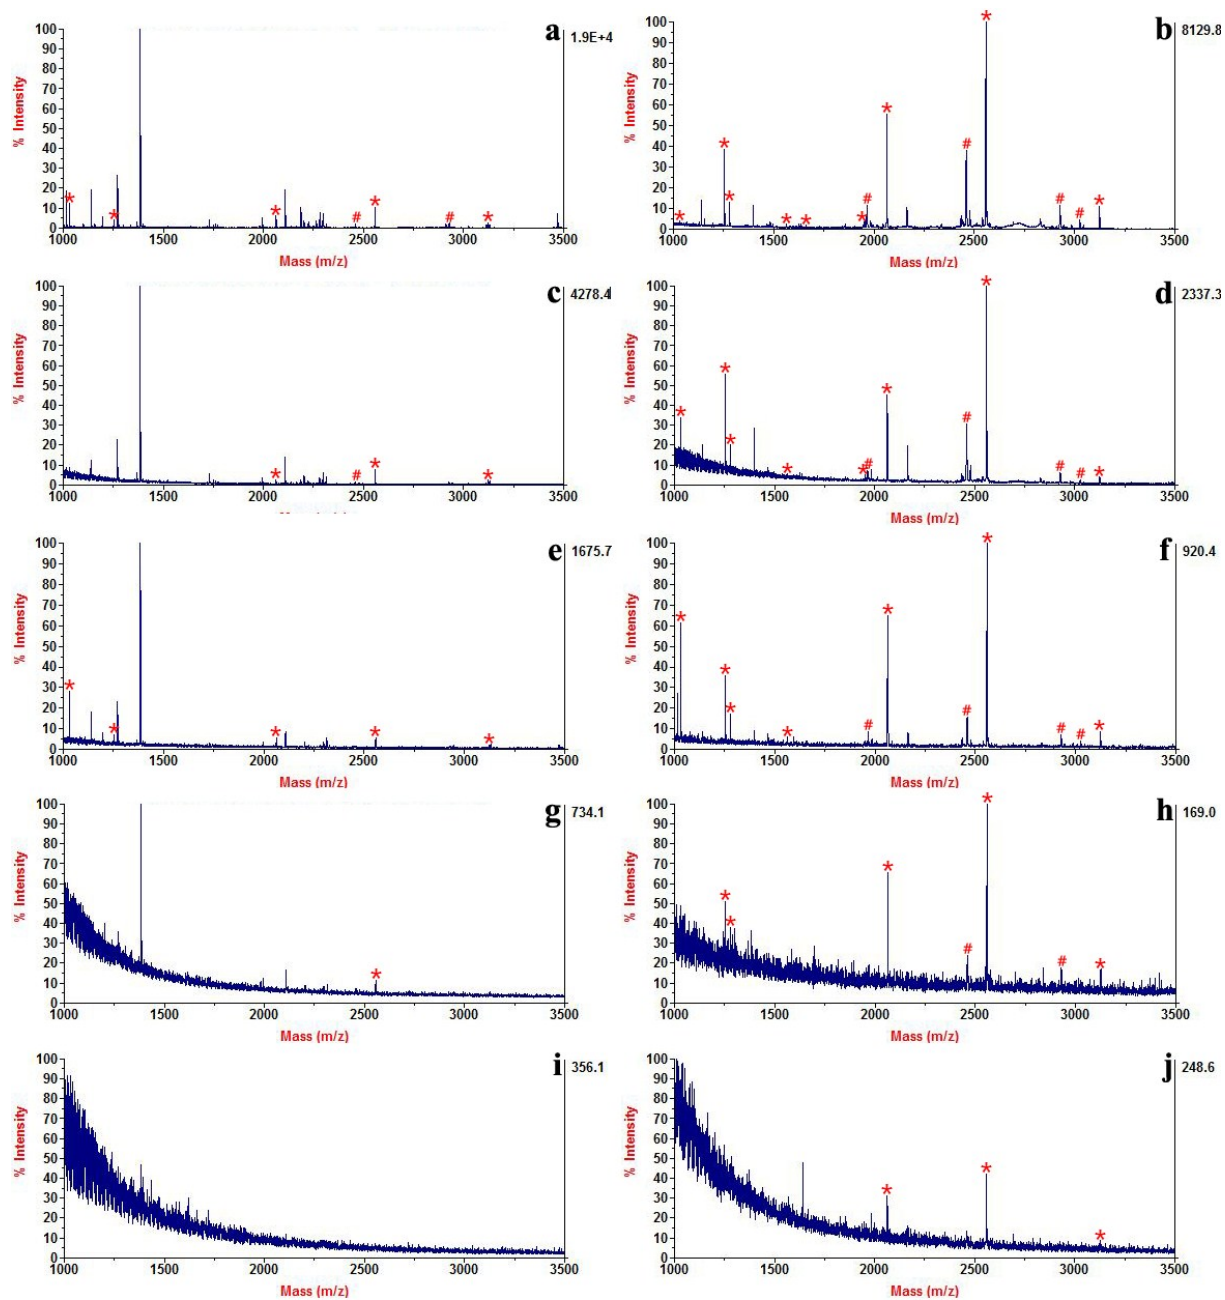

**Fig. S7** MALDI-TOF mass spectra of the  $\beta$ -casein tryptic digests with various concentrations before enrichment: (a)  $4 \times 10^{-7}$  M, (c)  $4 \times 10^{-8}$  M, (e)  $4 \times 10^{-9}$  M, (g)  $4 \times 10^{-10}$  M and (i)  $4 \times 10^{-11}$  M; and after enrichment with HPT: (b)  $4 \times 10^{-7}$  M, (d)  $4 \times 10^{-8}$  M, (f)  $4 \times 10^{-9}$  M, (h)  $4 \times 10^{-10}$  M and (j)  $4 \times 10^{-11}$  M. The peaks marked with asterisks represent phosphopeptides and those marked with pound signs represent dephosphorylated peptides.

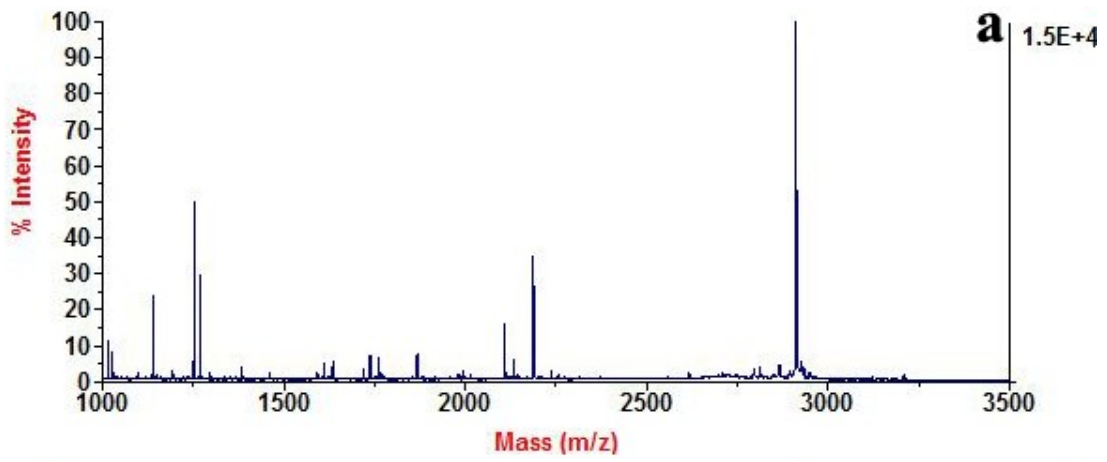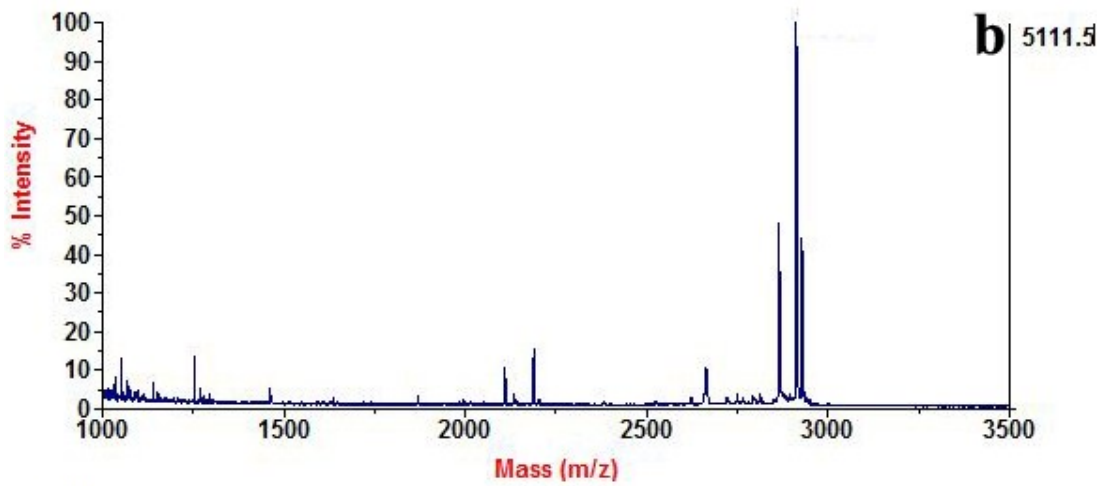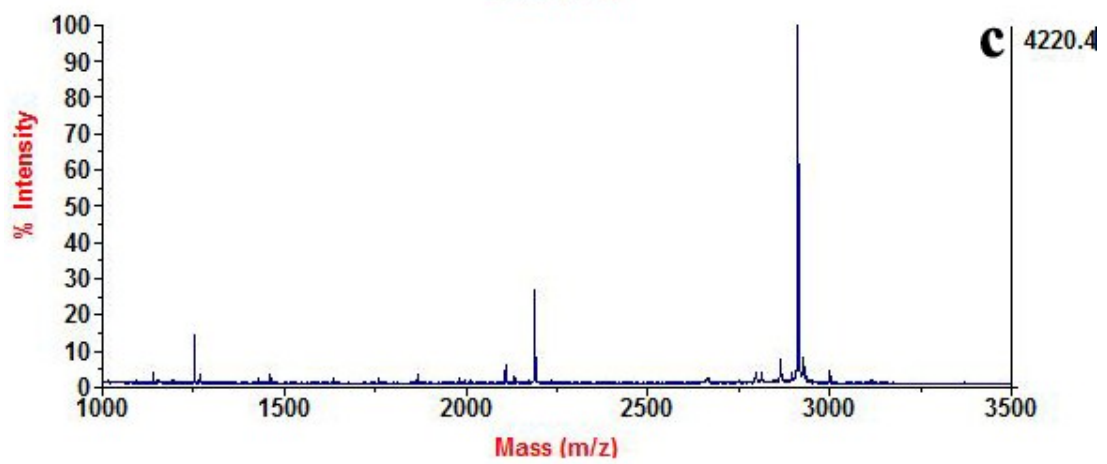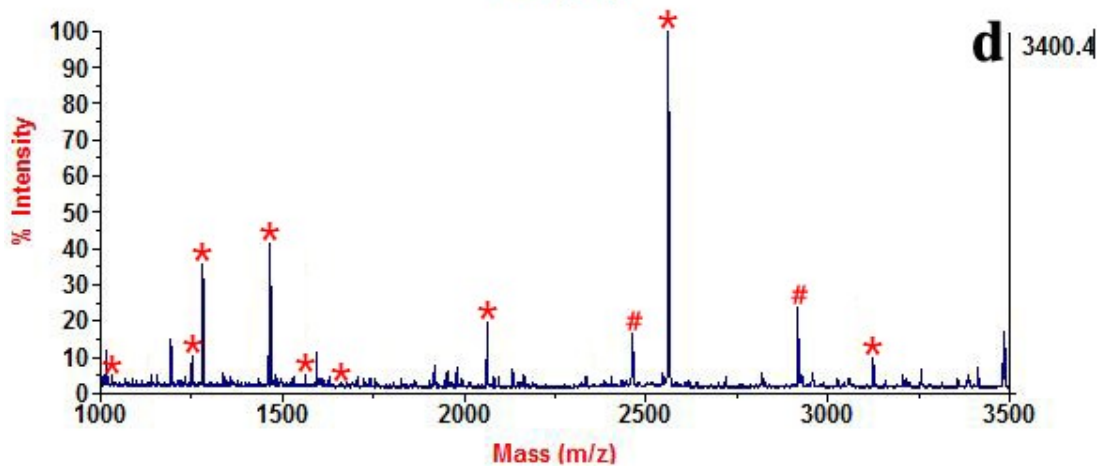

**Fig. S8** MALDI-TOF mass spectra of the  $\beta$ -casein solution (0.1  $\mu\text{g}/\mu\text{L}$ ) (a) after 16 h in-solution tryptic digestion and (b) after 30 min in-solution digestion; (c) the supernatant and (d) the eluent of the  $\beta$ -casein solution (0.1  $\mu\text{g}/\mu\text{L}$ ) after 30 min HPT-assisted digestion.

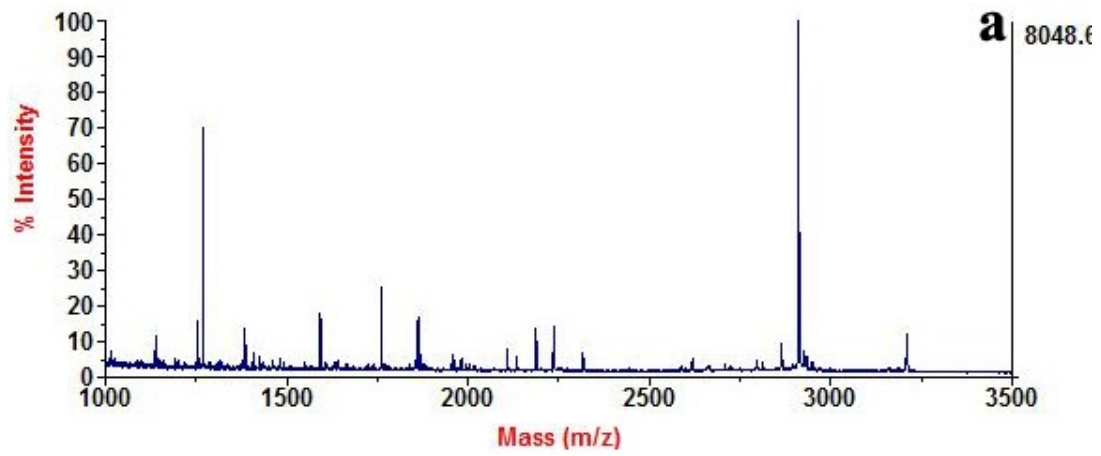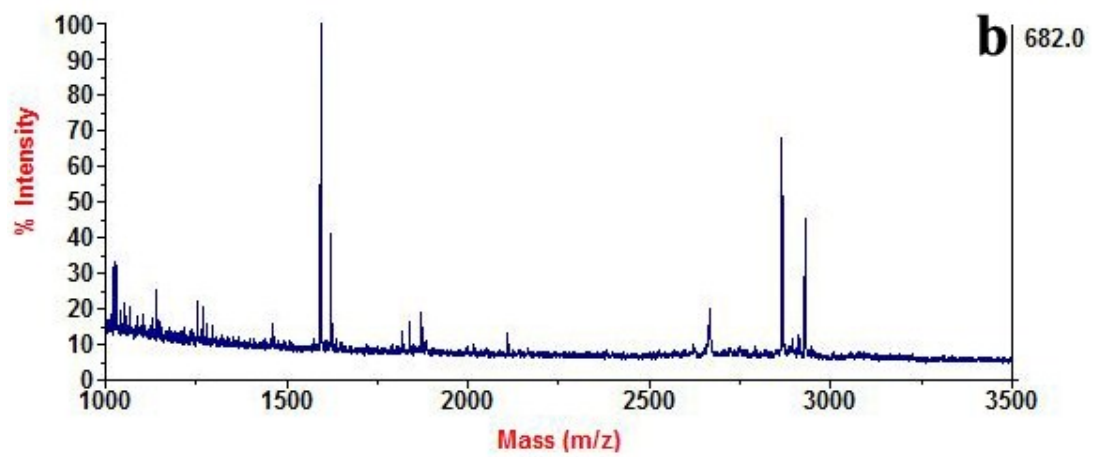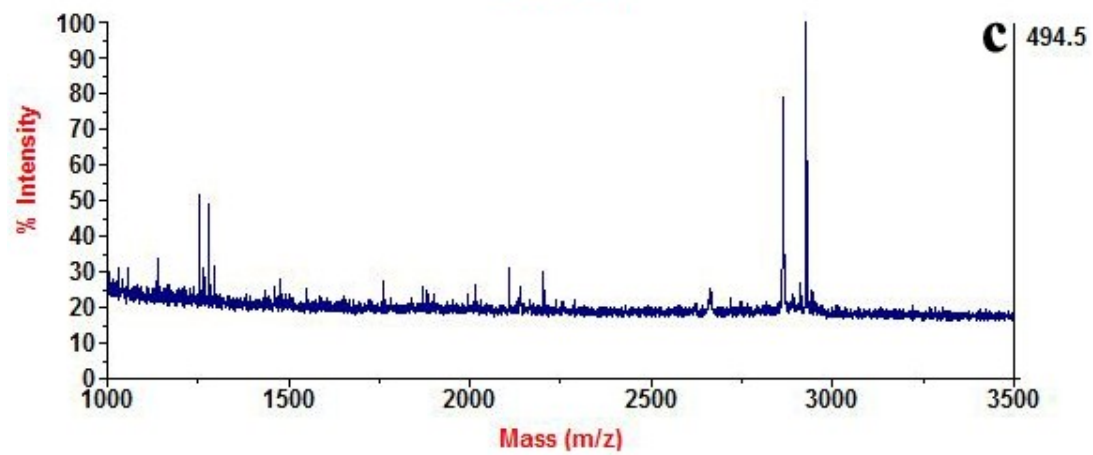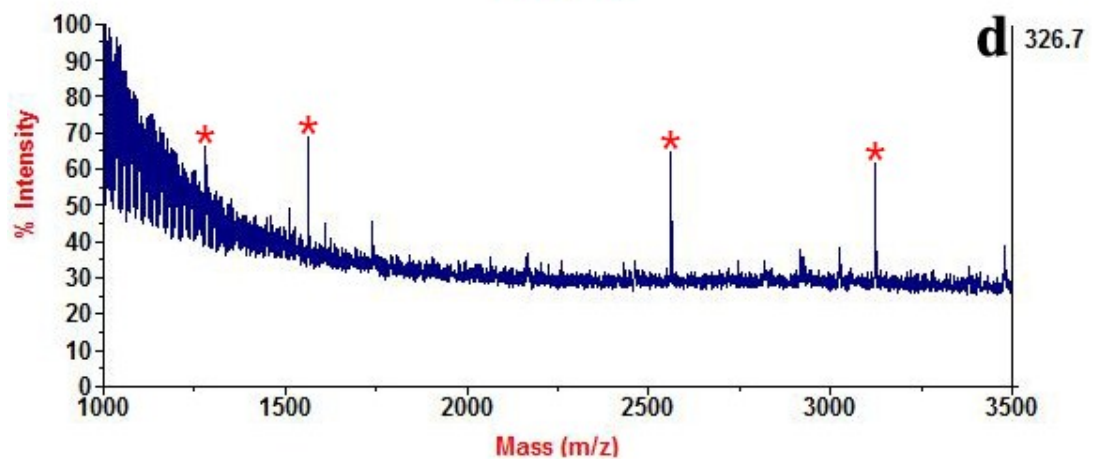



**Fig. S9** MALDI-TOF mass spectra of the  $\beta$ -casein solution (0.01  $\mu\text{g}/\mu\text{L}$ ) (a) after 16 h in-solution tryptic digestion and (b) after 30 min in-solution digestion; (c) the supernatant and (d) the eluent of the  $\beta$ -casein solution (0.01  $\mu\text{g}/\mu\text{L}$ ) after 30 min HPT-assisted digestion. The peaks marked with asterisks represent phosphopeptides.

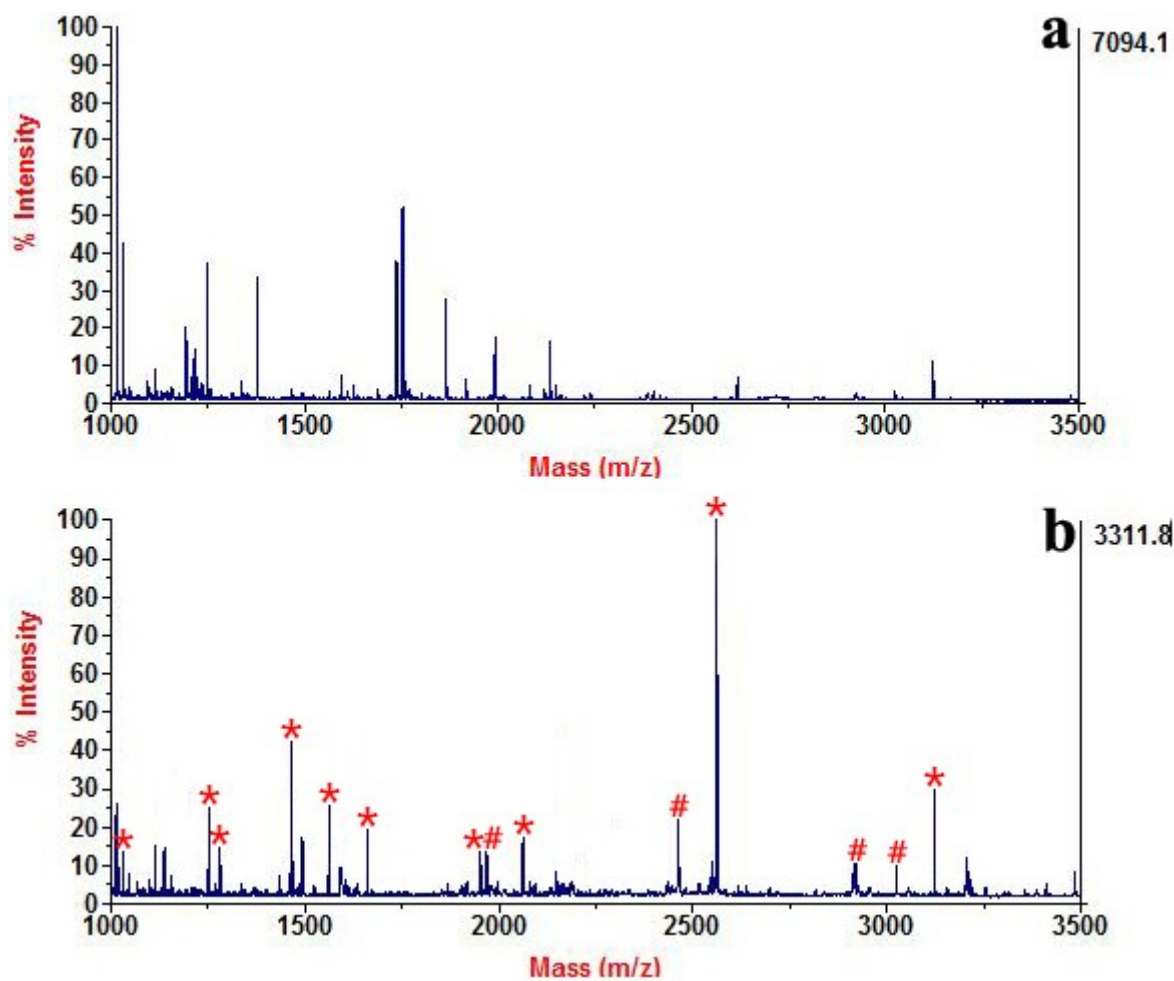

**Fig. S10** MALDI-TOF mass spectra of the  $\beta$ -casein solution ( $1 \mu\text{g}/\mu\text{L}$ ) after 30 min digestion and *in situ* enrichment: (a) with HPT derived from the MIL-125 (Ti) MOFs without hydrolysis; (b) with HPT derived from the MIL-125 (Ti) MOFs with hydrolysis.

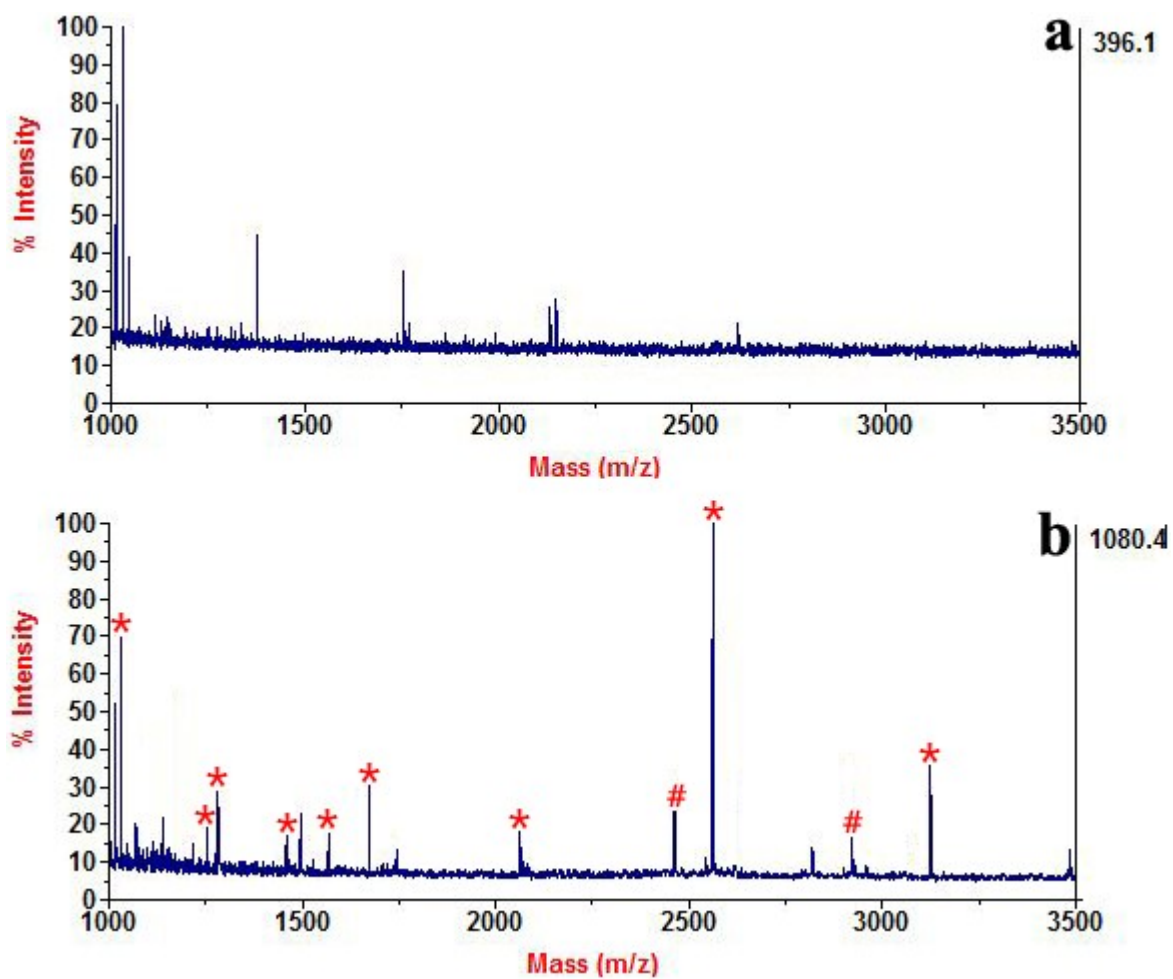

**Fig. S11** MALDI-TOF mass spectra of the  $\beta$ -casein solution ( $0.1 \mu\text{g}/\mu\text{L}$ ) after 30 min digestion and *in situ* enrichment: (a) with HPT derived from the MIL-125 (Ti) MOFs without hydrolysis; (b) with HPT derived from the MIL-125 (Ti) MOFs with hydrolysis.

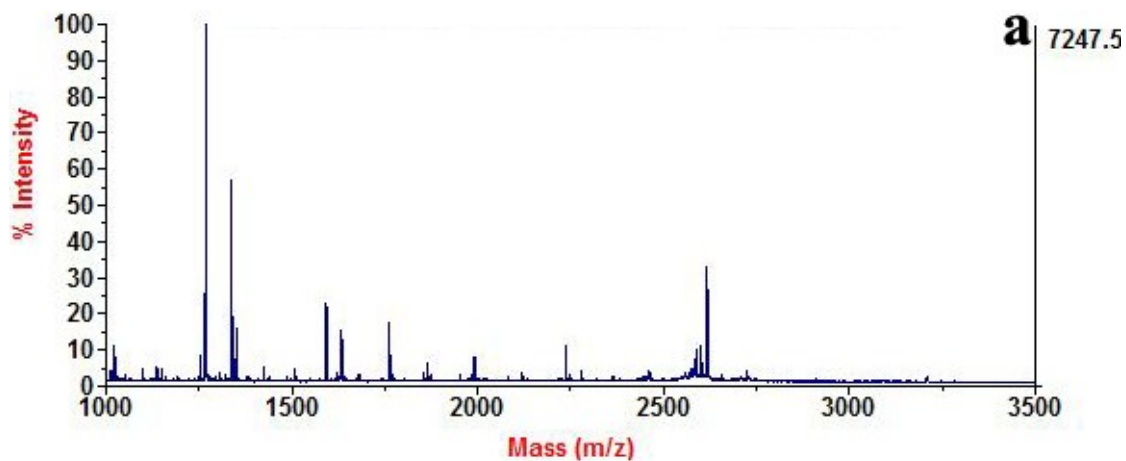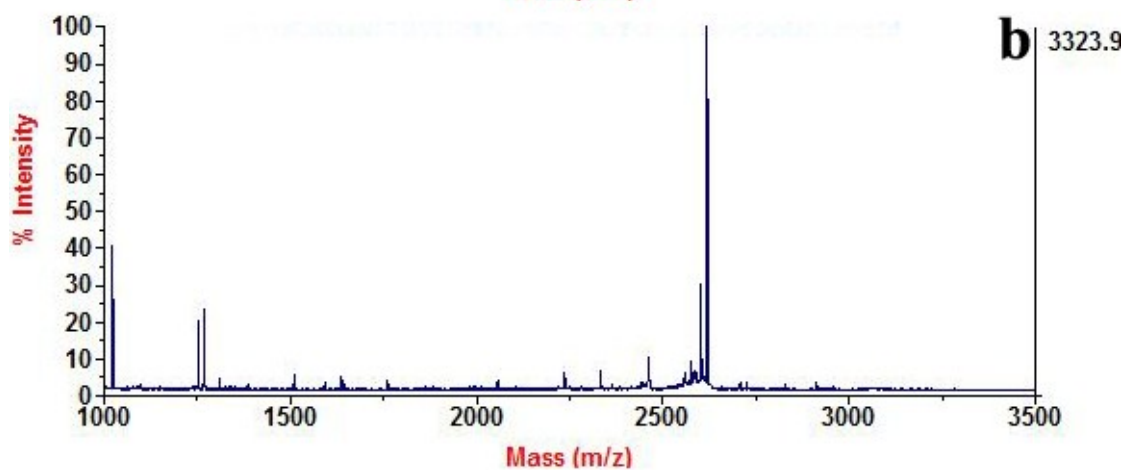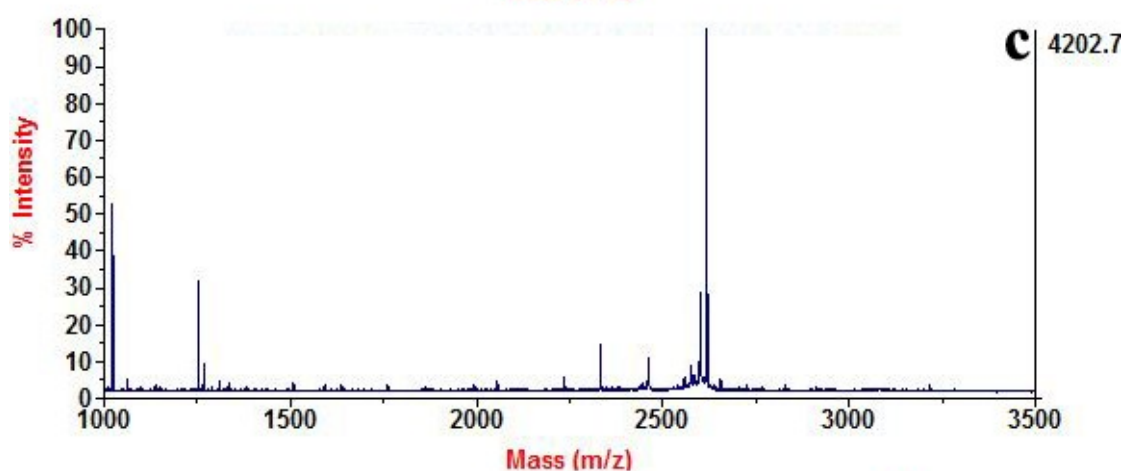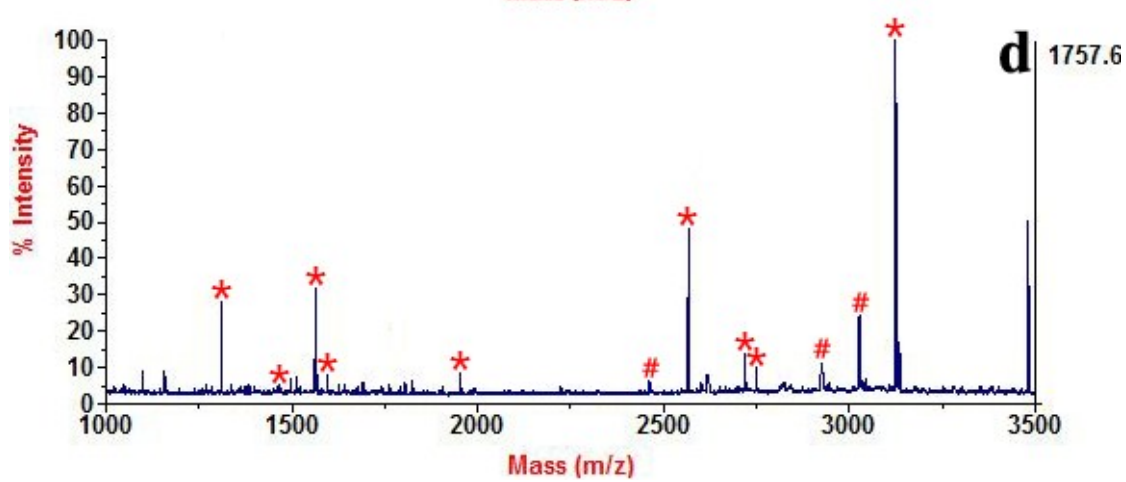

**Fig. S12** MALDI-TOF mass spectra of the nonfat bovine milk solution (1  $\mu\text{g}/\mu\text{L}$ ) after (a) 16 h in-solution tryptic digestion and (b) after 30 min in-solution digestion (b); (c) the supernatant and (d) the eluent of the nonfat bovine milk solution after 30 min HPT-assisted digestion.

**Table S1.** The EDX analysis results of HPT and MIL-125 (Ti)

| Sample       | Run | Element symbol | Weight concentration / % | Error |
|--------------|-----|----------------|--------------------------|-------|
| HPT          | 1   | Ti             | 35.4                     | 0.1   |
|              |     | O              | 42.9                     | 0.2   |
|              |     | N              | 16.4                     | 2.3   |
|              |     | C              | 5.3                      | 2.0   |
|              | 2   | Ti             | 29.0                     | 0.0   |
|              |     | O              | 48.1                     | 0.4   |
|              |     | N              | 17.8                     | 2.9   |
|              |     | C              | 5.1                      | 1.6   |
|              | 3   | Ti             | 26.2                     | 0.1   |
|              |     | O              | 53.8                     | 0.1   |
|              |     | N              | 15.8                     | 3.3   |
|              |     | C              | 4.1                      | 1.2   |
| MIL-125 (Ti) | 1   | C              | 32.0                     | 0.9   |
|              |     | O              | 39.4                     | 0.0   |
|              |     | Ti             | 6.4                      | 0.1   |
|              |     | N              | 22.2                     | 3.8   |

**Table S2.** Detailed information of the phosphopeptides identified from  $\beta$ -casein tryptic digests after enrichment with HPT and from  $\beta$ -casein solutions after 30 min HPT-assisted digestion

| Theoretical m/z | aa             | Peptide sequence                      |
|-----------------|----------------|---------------------------------------|
| 3122.27         | $\beta$ /1-25  | RELEELNVPGEIVE[pS]L[pS][pS][pS]EESITR |
| 2556.09         | $\beta$ /33-52 | FQ[pS]JEEQQQTEDELQDKIHPF              |
| 2061.83         | $\beta$ /33-48 | FQ[pS]JEEQQQTEDELQDK                  |

|         |                      |                         |
|---------|----------------------|-------------------------|
| 1951.95 | $\alpha$ -S1/104-119 | YKVPQLEIVPN[pS]AEER     |
| 1660.75 | $\alpha$ -S1/106-119 | VPQLEIVPN[pS]AEER       |
| 1561.70 | $\alpha$ -S2/126-137 | EQL[pS]T[pS]EENSKK      |
| 1466.51 | $\alpha$ -S2/138-149 | TVDME[pS]TEVFTK         |
| 1278.60 | $\beta$ /33-52       | FQ[pS]EEQQQTEDELQDKIHPF |
| 1253.11 | $\alpha$ -S2/138-147 | TVD[Mo]ME[pS]TEVF       |
| 1030.91 | $\beta$ /33-48       | FQ[pS]EEQQQTEDELQDK     |
